# Supplementary material
Source: publisher site journal article supplement (https://www.dovepress.com/article/408631)
Supplement: Supplementary file 1 [file get_supplementary_file.php]

| **Supplementary Table 1.** **Gene list for whole exome sequencing** | | | | | | | | | |
| --- | --- | --- | --- | --- | --- | --- | --- | --- | --- |
| *A2M* | *AAAS* | *AAGAB* | *AARS2* | *AASS* | *ABAT* | *ABCA1* | *ABCA12* | *ABCA4* | *ABCB11* |
| *ABCB4* | *ABCB6* | *ABCB7* | *ABCC2* | *ABCC6* | *ABCC8* | *ABCD1* | *ABCD3* | *ABCD4* | *ABCG5* |
| *ABCG8* | *ABHD5* | *ACAD8* | *ACAD9* | *ACADM* | *ACADS* | *ACADSB* | *ACADVL* | *ACAT1* | *ACE* |
| *ACKR1* | *ACO2* | *ACOX1* | *ACOX2* | *ACP5* | *ACSF3* | *ACTA1* | *ACTB* | *ACTG1* | *ACTG2* |
| *ACTN4* | *ACVRL1* | *ADA* | *ADA2* | *ADAMTS10* | *ADAMTS13* | *ADAMTS17* | *ADAMTS3* | *ADAMTSL2* | *ADAR* |
| *ADAT3* | *ADCK3* | *ADCY10* | *ADCY3* | *ADD1* | *ADD3* | *ADGRG1* | *ADGRG2* | *ADH1C* | *ADK* |
| *ADNP* | *ADRB2* | *ADRB3* | *ADSL* | *AFF4* | *AFG3L2* | *AGA* | *AGBL5* | *AGK* | *AGL* |
| *AGPAT2* | *AGPS* | *AGRP* | *AGT* | *AGTR1* | *AGXT* | *AGXT2* | *AHCY* | *AHI1* | *AHR* |
| *AIFM1* | *AIP* | *AIPL1* | *AIRE* | *AK2* | *AK7* | *AKAP9* | *AKR1C2* | *AKR1C4* | *AKR1D1* |
| *AKT1* | *AKT2* | *AKT3* | *ALAD* | *ALAS2* | *ALB* | *ALDH18A1* | *ALDH2* | *ALDH4A1* | *ALDH5A1* |
| *ALDOA* | *ALDOB* | *ALG1* | *ALG10B* | *ALG11* | *ALG12* | *ALG13* | *ALG2* | *ALG3* | *ALG6* |
| *ALG8* | *ALG9* | *ALMS1* | *ALOXE3* | *ALPL* | *ALX3* | *AMACR* | *AMER1* | *AMH* | *AMHR2* |
| *AMMECR1* | *AMT* | *ANAPC1* | *ANGPTL3* | *ANK1* | *ANK2* | *ANKH* | *ANKLE2* | *ANKS6* | *ANLN* |
| *ANO10* | *ANO5* | *ANOS1* | *ANTXR1* | *ANTXR2* | *AP1B1* | *AP1S1* | *AP2S1* | *AP3B1* | *AP3B2* |
| *APC* | *APC2* | *APOA1* | *APOA2* | *APOA5* | *APOB* | *APOC2* | *APOC3* | *APOE* | *APOL1* |
| *APOPT1* | *APP* | *APPL1* | *APRT* | *APTX* | *AQP2* | *AR* | *ARG1* | *ARHGDIA* | *ARHGEF18* |
| *ARID1A* | *ARID1B* | *ARID2* | *ARL13B* | *ARL2BP* | *ARL3* | *ARL6* | *ARMC5* | *ARMC9* | *ARNT2* |
| *ARSA* | *ARSB* | *ARSE* | *ARX* | *ASAH1* | *ASCC1* | *ASIP* | *ASL* | *ASPA* | *ASPM* |
| *ASS1* | *ASXL1* | *ASXL2* | *ATAD1* | *ATAD3A* | *ATIC* | *ATL3* | *ATM* | *ATN1* | *ATP11C* |
| *ATP13A2* | *ATP1A1* | *ATP1A2* | *ATP2A1* | *ATP5A1* | *ATP5F1A* | *ATP5F1D* | *ATP5F1E* | *ATP5MD* | *ATP6AP1* |
| *ATP6AP2* | *ATP6B1* | *ATP6V0A2* | *ATP6V0A4* | *ATP6V1B1* | *ATP7A* | *ATP7B* | *ATP8B1* | *ATPAF2* | *ATR* |
| *ATRX* | *ATXN2* | *ATXN8OS* | *AUH* | *AURKA* | *AURKC* | *AVIL* | *AVP* | *AVPR2* | *AXIN1* |
| *AXIN2* | *B2M* | *B3GLCT* | *B4GALNT1* | *B4GALT1* | *B4GALT7* | *B4GAT1* | *B9D1* | *B9D2* | *BAAT* |
| *BAP1* | *BAX* | *BAZ1B* | *BBIP1* | *BBS1* | *BBS10* | *BBS12* | *BBS2* | *BBS4* | *BBS5* |
| *BBS7* | *BBS9* | *BCAM* | *BCAP31* | *BCKDHA* | *BCKDHB* | *BCKDK* | *BCL10* | *BCL7B* | *BCOR* |
| *BCR* | *BCS1L* | *BDP1* | *BEST1* | *BGN* | *BICC1* | *BLK* | *BLM* | *BLOC1S3* | *BLOC1S6* |
| *BLVRA* | *BMP1* | *BMP15* | *BMP2* | *BMP4* | *BMPER* | *BMPR1A* | *BMPR1B* | *BNC1* | *BOLA3* |
| *BPGM* | *BRAF* | *BRAT1* | *BRCA1* | *BRCA2* | *BRIP1* | *BRWD3* | *BSCL2* | *BSND* | *BTD* |
| *BTK* | *BTNL2* | *BUB1* | *BUB1B* | *BUD23* | *C12orf65* | *C15orf41* | *C19orf12* | *C1NH* | *C1QA* |
| *C1QB* | *C1QBP* | *C1QC* | *C1R* | *C1S* | *C2* | *C2CD3* | *C2orf25* | *C3* | *C4A* |
| *C4B* | *C5* | *C6* | *C7* | *C8A* | *C8B* | *C8orf37* | *C9* | *CA12* | *CA2* |
| *CA4* | *CA5A* | *CACNA1C* | *CACNA1D* | *CACNA1F* | *CACNA1H* | *CACNA1S* | *CAD* | *CALCR* | *CALM1* |
| *CALM2* | *CALM3* | *CANT1* | *CAPN10* | *CAPN3* | *CARD9* | *CARS2* | *CARTPT* | *CASP10* | *CASP8* |
| *CASR* | *CAT* | *CATSPER1* | *CAV1* | *CAV3* | *CAVIN1* | *CBLIF* | *CBS* | *CBX2* | *CC2D2A* |
| *CCBE1* | *CCDC115* | *CCDC22* | *CCDC28B* | *CCDC78* | *CCN6* | *CCND1* | *CCND2* | *CCNQ* | *CCR5* |
| *CCT5* | *CD151* | *CD19* | *CD2AP* | *CD36* | *CD40LG* | *CD81* | *CD96* | *CDAN1* | *CDC42* |
| *CDC45L* | *CDC73* | *CDH1* | *CDH11* | *CDH23* | *CDHR1* | *CDK5RAP2* | *CDK6* | *CDKL5* | *CDKN1A* |
| *CDKN1B* | *CDKN1C* | *CDKN2A* | *CDKN2B* | *CDKN2C* | *CDON* | *CEL* | *CELA2A* | *CENPF* | *CENPJ* |
| *CENPT* | *CEP104* | *CEP120* | *CEP135* | *CEP152* | *CEP164* | *CEP19* | *CEP290* | *CEP41* | *CEP55* |
| *CEP57* | *CEP83* | *CERKL* | *CETP* | *CFAP43* | *CFAP44* | *CFAP65* | *CFB* | *CFC1* | *CFD* |
| *CFH* | *CFHR1* | *CFHR3* | *CFHR5* | *CFI* | *CFTR* | *CHCHD10* | *CHD4* | *CHD7* | *CHEK2* |
| *CHI3L1* | *CHKB* | *CHN1* | *CHRM3* | *CHRNA3* | *CHST14* | *CHST3* | *CIDEC* | *CISD2* | *CISH* |
| *CIT* | *CLCN2* | *CLCN5* | *CLCN7* | *CLCNKA* | *CLCNKB* | *CLDN1* | *CLDN10* | *CLDN16* | *CLDN19* |
| *CLEC7A* | *CLIP2* | *CLN3* | *CLN5* | *CLN6* | *CLN8* | *CLPB* | *CLPP* | *CLPX* | *CLRN1* |
| *CLTC* | *CNBP* | *CNGA1* | *CNGB1* | *CNNM2* | *CNOT1* | *CNTNAP2* | *COA5* | *COA6* | *COA7* |
| *COA8* | *COG1* | *COG2* | *COG4* | *COG5* | *COG6* | *COG7* | *COG8* | *COL10A1* | *COL11A1* |
| *COL11A2* | *COL17A1* | *COL18A1* | *COL1A1* | *COL1A2* | *COL25A1* | *COL27A1* | *COL2A1* | *COL3A1* | *COL4A1* |
| *COL4A3* | *COL4A4* | *COL4A5* | *COL5A1* | *COL5A2* | *COL6A1* | *COL6A2* | *COL6A3* | *COL7A1* | *COL9A1* |
| *COL9A2* | *COL9A3* | *COLEC11* | *COMP* | *COMT* | *COPA* | *COQ2* | *COQ4* | *COQ6* | *COQ7* |
| *COQ8A* | *COQ8B* | *COQ9* | *CORIN* | *COX10* | *COX14* | *COX15* | *COX20* | *COX4I2* | *COX6A1* |
| *COX6B1* | *COX7B* | *COX8A* | *CP* | *CPLANE1* | *CPOX* | *CPS1* | *CPT1A* | *CPT1C* | *CPT2* |
| *CR1* | *CRB1* | *CRB2* | *CREB3L1* | *CREBBP* | *CRTAP* | *CSF1R* | *CSPP1* | *CTC1* | *CTCF* |
| *CTDP1* | *CTH* | *CTHRC1* | *CTLA4* | *CTNNB1* | *CTNS* | *CTRC* | *CTSA* | *CTSC* | *CTSD* |
| *CTSF* | *CTSK* | *CTU2* | *CUBN* | *CUL3* | *CUL4B* | *CWC27* | *CYB561* | *CYB5A* | *CYBA* |
| *CYBB* | *CYC1* | *CYCS* | *CYP11A1* | *CYP11B1* | *CYP11B2* | *CYP17A1* | *CYP19A1* | *CYP21A2* | *CYP24A1* |
| *CYP27A1* | *CYP27B1* | *CYP2R1* | *CYP2U1* | *CYP3A5* | *CYP4F22* | *CYP7B1* | *D2HGDH* | *DACT1* | *DARS2* |
| *DBH* | *DBT* | *DCAF17* | *DCC* | *DCDC2* | *DCHS1* | *DCLRE1C* | *DCTN1* | *DDB2* | *DDC* |
| *DDHD1* | *DDOST* | *DDR2* | *DDRGK1* | *DDX3X* | *DDX41* | *DDX58* | *DDX59* | *DEF6* | *DGAT1* |
| *DGKE* | *DGUOK* | *DHCR24* | *DHCR7* | *DHDDS* | *DHFR* | *DHH* | *DHODH* | *DHTKD1* | *DHX37* |
| *DHX38* | *DIABLO* | *DIAPH2* | *DICER1* | *DIS3L2* | *DJ1* | *DKC1* | *DLAT* | *DLC1* | *DLD* |
| *DLL1* | *DLL4* | *DLST* | *DLX3* | *DMD* | *DMGDH* | *DMP1* | *DMPK* | *DMXL2* | *DNA2* |
| *DNAH1* | *DNAH17* | *DNAJB11* | *DNAJC12* | *DNAJC19* | *DNAJC3* | *DNAJC30* | *DNAJC5* | *DNAL4* | *DNASE1* |
| *DNASE1L3* | *DNM1L* | *DNM2* | *DNMT1* | *DNMT3A* | *DOLK* | *DPAGT1* | *DPF2* | *DPH1* | *DPM1* |
| *DPM2* | *DPM3* | *DPY19L2* | *DPYD* | *DPYS* | *DRD3* | *DSE* | *DSG1* | *DSTYK* | *DTNBP1* |
| *DUOX2* | *DUOXA2* | *DUSP6* | *DYM* | *DYNC2H1* | *DYNC2LI1* | *DYRK1B* | *DZIP1L* | *EARS2* | *EBF3* |
| *EBP* | *ECE1* | *ECHS1* | *EDA* | *EDAR* | *EDARADD* | *EDN3* | *EDNRA* | *EDNRB* | *EED* |
| *EFEMP2* | *EGF* | *EGFR* | *EGLN1* | *EHHADH* | *EHMT1* | *EIF2AK3* | *EIF2B1* | *EIF2B2* | *EIF2B3* |
| *EIF2B4* | *EIF2B5* | *EIF2S3* | *EIF4G1* | *EIF4H* | *ELAC2* | *ELN* | *ELP1* | *EMD* | *EMP2* |
| *ENG* | *ENO3* | *ENPP1* | *ENTPD1* | *EP300* | *EPAS1* | *EPB41* | *EPB42* | *EPG5* | *EPHX1* |
| *EPHX2* | *EPO* | *ERAL1* | *ERBB3* | *ERCC1* | *ERCC2* | *ERCC3* | *ERCC4* | *ERCC5* | *ERCC6* |
| *ERCC6L2* | *ERCC8* | *ESCO2* | *ESR1* | *ESR2* | *ETFA* | *ETFB* | *ETFDH* | *ETHE1* | *EVC* |
| *EVC2* | *EXOC6B* | *EXOSC2* | *EXT2* | *EXTL3* | *EYA1* | *EYS* | *F10* | *F2* | *F5* |
| *F8* | *F9* | *FADD* | *FAH* | *FAM111A* | *FAM111B* | *FAM126A* | *FAM134B* | *FAM161A* | *FAM20A* |
| *FAM20C* | *FAM58A* | *FAN1* | *FANCA* | *FANCB* | *FANCC* | *FANCD2* | *FANCE* | *FANCF* | *FANCI* |
| *FANCM* | *FAR1* | *FARS2* | *FARSB* | *FAS* | *FASLG* | *FASTKD2* | *FAT4* | *FBLN5* | *FBN1* |
| *FBP1* | *FBXL4* | *FCGR2A* | *FCGR2B* | *FCYT* | *FDX2* | *FDXR* | *FECH* | *FERMT3* | *FEZF1* |
| *FGA* | *FGD1* | *FGF10* | *FGF17* | *FGF20* | *FGF23* | *FGF8* | *FGFR1* | *FGFR2* | *FGFR3* |
| *FH* | *FHL1* | *FIBP* | *FIG4* | *FIGLA* | *FKBP10* | *FKBP6* | *FLAD1* | *FLCN* | *FLG* |
| *FLNA* | *FLNB* | *FLNC* | *FLRT3* | *FLT4* | *FMO3* | *FMR1* | *FN1* | *FOXC2* | *FOXD3* |
| *FOXE1* | *FOXF1* | *FOXG1* | *FOXI1* | *FOXL2* | *FOXP1* | *FOXP3* | *FOXRED1* | *FRAS1* | *FREM1* |
| *FREM2* | *FSCN2* | *FSHB* | *FSHR* | *FSIP2* | *FTCD* | *FTH1* | *FTL* | *FTO* | *FUCA1* |
| *FUT8* | *FXN* | *FXR1* | *FXYD2* | *G6PC* | *G6PC3* | *G6PD* | *GAA* | *GABBR2* | *GABRA3* |
| *GALC* | *GALE* | *GALK1* | *GALNS* | *GALNT3* | *GALT* | *GANAB* | *GATA1* | *GATA3* | *GATA4* |
| *GATA6* | *GATB* | *GATC* | *GATM* | *GBA* | *GBE1* | *GCDH* | *GCGR* | *GCH1* | *GCK* |
| *GCLC* | *GCM2* | *GCSH* | *GDAP1* | *GDF2* | *GDF3* | *GDF5* | *GDF6* | *GDF9* | *GDNF* |
| *GEMIN4* | *GFAP* | *GFER* | *GFM1* | *GFM2* | *GFPT1* | *GH1* | *GHR* | *GHRHR* | *GHRL* |
| *GHSR* | *GJA1* | *GJB2* | *GK* | *GLA* | *GLB1* | *GLCCI1* | *GLDC* | *GLI1* | *GLI2* |
| *GLI3* | *GLIS2* | *GLIS3* | *GLRX5* | *GLS* | *GLUD1* | *GLUD2* | *GLYCTK* | *GM2A* | *GMNN* |
| *GMPPA* | *GNA11* | *GNAI2* | *GNAO1* | *GNAS* | *GNAS-AS1* | *GNB1* | *GNB3* | *GNE* | *GNMT* |
| *GNPAT* | *GNPTAB* | *GNPTG* | *GNRH1* | *GNRHR* | *GNS* | *GORAB* | *GOT2* | *GP1BA* | *GP1BB* |
| *GP9* | *GPC3* | *GPC6* | *GPD1* | *GPD2* | *GPHN* | *GPI* | *GPIHBP1* | *GPR101* | *GPT2* |
| *GREB1L* | *GRHPR* | *GRIA3* | *GRIN2B* | *GRIP1* | *GRN* | *GSBS* | *GSN* | *GSR* | *GSS* |
| *GTF2E2* | *GTF2H5* | *GTF2I* | *GTF2IRD1* | *GTF2IRD2* | *GTPBP3* | *GUCA1B* | *GUCY2D* | *GUF1* | *GUSB* |
| *GYG1* | *GYPA* | *GYPB* | *GYPC* | *GYS1* | *GYS2* | *H19* | *H6PD* | *HAAO* | *HABP2* |
| *HACE1* | *HADH* | *HADHA* | *HADHB* | *HAL* | *HAMP* | *HARS2* | *HAVCR2* | *HAX1* | *HBA1* |
| *HBA2* | *HBB* | *HBG2* | *HCCS* | *HCFC1* | *HCRT* | *HDAC8* | *HESX1* | *HEXA* | *HEXB* |
| *HFE* | *HFM1* | *HGD* | *HGF* | *HGSNAT* | *HIBCH* | *HJV* | *HK1* | *HLA-DRB1* | *HLCS* |
| *HMBS* | *HMGA1* | *HMGCL* | *HMGCS2* | *HMOX1* | *HNF1A* | *HNF1B* | *HNF4A* | *HNRNPK* | *HNRNPU* |
| *HOGA1* | *HOXA13* | *HOXD13* | *HPD* | *HPGD* | *HPRT1* | *HPS1* | *HPS3* | *HPS4* | *HPS5* |
| *HPS6* | *HPSE2* | *HRAS* | *HS6ST1* | *HSD11B1* | *HSD11B2* | *HSD17B10* | *HSD17B3* | *HSD17B4* | *HSD3B2* |
| *HSD3B7* | *HSPA9* | *HSPB1* | *HSPD1* | *HSPG2* | *HTR1A* | *HTR2A* | *HTRA2* | *HTT* | *HUWE1* |
| *HYAL1* | *HYLS1* | *HYOU1* | *IARS1* | *IARS2* | *IBA57* | *ICAM1* | *ICK* | *ICR1* | *IDH2* |
| *IDH3B* | *IDS* | *IDUA* | *IER3IP1* | *IFIH1* | *IFITM5* | *IFNAR2* | *IFNG* | *IFT122* | *IFT140* |
| *IFT172* | *IFT27* | *IFT43* | *IFT52* | *IFT74* | *IFT80* | *IFT81* | *IGF1* | *IGF1R* | *IGF2* |
| *IGF2BP2* | *IGF2R* | *IGFALS* | *IGSF1* | *IHH* | *IKBKG* | *IL10* | *IL17F* | *IL17RA* | *IL17RC* |
| *IL17RD* | *IL18BP* | *IL1B* | *IL1RN* | *IL21R* | *IL2RA* | *IL2RG* | *IL31RA* | *IL6* | *IMPAD1* |
| *IMPDH1* | *IMPG2* | *INF2* | *INPP5E* | *INPPL1* | *INS* | *INSL3* | *INSR* | *INTU* | *INVS* |
| *IQCB1* | *IRF5* | *IRF6* | *IRS1* | *IRS2* | *IRX5* | *ISCA1* | *ISCA2* | *ISCU* | *ITCH* |
| *ITGA2B* | *ITGA3* | *ITGA6* | *ITGA8* | *ITGB2* | *ITGB3* | *ITGB4* | *ITIH4* | *ITK* | *ITPKC* |
| *IVD* | *IYD* | *JAG1* | *JAK2* | *JAM3* | *JPH1* | *KANK1* | *KANK2* | *KANSL1* | *KARS1* |
| *KAT6B* | *KATNIP* | *KCNA1* | *KCNA4* | *KCNE1* | *KCNE2* | *KCNE3* | *KCNH1* | *KCNH2* | *KCNJ1* |
| *KCNJ10* | *KCNJ11* | *KCNJ18* | *KCNJ2* | *KCNJ5* | *KCNN4* | *KCNQ1* | *KCNQ1OT1* | *KCTD1* | *KCTD7* |
| *KDM5C* | *KDM6A* | *KHDC3L* | *KHK* | *KIAA0556* | *KIAA0586* | *KIAA0753* | *KIAA1549* | *KIDINS220* | *KIF14* |
| *KIF1A* | *KIF1B* | *KIF5A* | *KIF7* | *KISS1* | *KISS1R* | *KIT* | *KIZ* | *KL* | *KLF1* |
| *KLF11* | *KLHL10* | *KLHL3* | *KLHL7* | *KLLN* | *KMT2A* | *KMT2D* | *KMT2E* | *KNL1* | *KRAS* |
| *KRT1* | *KRT10* | *KRT17* | *KRT18* | *KRT8* | *KYNU* | *L2HGDH* | *LAGE3* | *LAMA3* | *LAMB2* |
| *LAMB3* | *LAMC2* | *LAMP2* | *LARS1* | *LARS2* | *LAS1L* | *LBR* | *LCAT* | *LDHA* | *LDHB* |
| *LDLR* | *LDLRAP1* | *LEMD3* | *LEP* | *LEPR* | *LHB* | *LHCGR* | *LHX3* | *LHX4* | *LIAS* |
| *LIFR* | *LIG4* | *LIMK1* | *LIPA* | *LIPC* | *LIPE* | *LIPI* | *LIPN* | *LIPT1* | *LIPT2* |
| *LMAN1* | *LMBRD1* | *LMNA* | *LMNB1* | *LMNB2* | *LMX1B* | *LONP1* | *LPIN1* | *LPIN2* | *LPL* |
| *LRAT* | *LRBA* | *LRIG2* | *LRP2* | *LRP4* | *LRP5* | *LRP6* | *LRPPRC* | *LTBP2* | *LTBP3* |
| *LTBP4* | *LYRM4* | *LYRM7* | *LYST* | *LYZ* | *LZTFL1* | *LZTR1* | *MAB21L2* | *MAD2L2* | *MAFA* |
| *MAFB* | *MAGED2* | *MAGEL2* | *MAGI2* | *MAK* | *MAMLD1* | *MAN1B1* | *MAN2B1* | *MANBA* | *MAP2K1* |
| *MAP2K2* | *MAP3K1* | *MAP3K7* | *MAPK8IP1* | *MAPK8IP3* | *MAPKBP1* | *MAPT* | *MARS1* | *MARS2* | *MASP1* |
| *MASP2* | *MAT1A* | *MATN3* | *MAX* | *MBTPS2* | *MC2R* | *MC3R* | *MC4R* | *MCC* | *MCCC1* |
| *MCCC2* | *MCEE* | *MCFD2* | *MCM3AP* | *MCM4* | *MCM5* | *MCM8* | *MCM9* | *MCOLN1* | *MCP* |
| *MCPH1* | *MDH2* | *MDM2* | *MECP2* | *MECR* | *MED12* | *MED25* | *MEF2A* | *MEFV* | *MEGF8* |
| *MEIOB* | *MEMBER 9* | *MEN1* | *MEOX1* | *MERTK* | *MET* | *METTL27* | *MFF* | *MFN2* | *MFSD2A* |
| *MFSD8* | *MGAT2* | *MGME1* | *MGP* | *MICOS13* | *MICU1* | *MID1* | *MINPP1* | *MIPEP* | *MITF* |
| *MKKS* | *MKRN3* | *MKS1* | *MLH1* | *MLH3* | *MLPH* | *MLXIPL* | *MLYCD* | *MMAA* | *MMAB* |
| *MMACHC* | *MMADHC* | *MMP1* | *MMP14* | *MMP2* | *MMP21* | *MMUT* | *MNX1* | *MOCOS* | *MOCS1* |
| *MOCS2* | *MOG* | *MOGS* | *MPC1* | *MPDU1* | *MPI* | *MPLKIP* | *MPO* | *MPV17* | *MRAP* |
| *MRAP2* | *MRAS* | *MRE11A* | *MRM2* | *MRPL3* | *MRPL44* | *MRPS14* | *MRPS16* | *MRPS2* | *MRPS22* |
| *MRPS34* | *MRPS7* | *MSH2* | *MSH3* | *MSH5* | *MSH6* | *MSMO1* | *MSR1* | *MSTO1* | *MSX2* |
| *MTAP* | *MTFMT* | *MTHFD1* | *MTHFR* | *MTMR14* | *MTNR1B* | *MTO1* | *MTOR* | *MTPAP* | *MTR* |
| *MTRR* | *MT-TN* | *MTTP* | *MT-TS1* | *MUC1* | *MUSK* | *MUTYH* | *MVK* | *MYC* | *MYH7* |
| *MYH8* | *MYH9* | *MYL3* | *MYLK* | *MYLK2* | *MYMK* | *MYO15A* | *MYO1E* | *MYO5A* | *MYO5B* |
| *MYT1L* | *NAA10* | *NADK2* | *NAGA* | *NAGLU* | *NAGS* | *NANOS1* | *NANS* | *NARS2* | *NAT2* |
| *NAXD* | *NAXE* | *NBAS* | *NBEAL2* | *NBN* | *NCAPD3* | *NCF1* | *NCF2* | *NDN* | *NDP* |
| *NDUFA1* | *NDUFA10* | *NDUFA11* | *NDUFA12* | *NDUFA13* | *NDUFA2* | *NDUFA6* | *NDUFA9* | *NDUFAF1* | *NDUFAF2* |
| *NDUFAF3* | *NDUFAF4* | *NDUFAF5* | *NDUFAF6* | *NDUFAF8* | *NDUFB11* | *NDUFB3* | *NDUFB8* | *NDUFB9* | *NDUFS1* |
| *NDUFS2* | *NDUFS3* | *NDUFS4* | *NDUFS6* | *NDUFS7* | *NDUFS8* | *NDUFV1* | *NDUFV2* | *NEB* | *NECTIN1* |
| *NEFH* | *NEK1* | *NEK2* | *NEK8* | *NEU1* | *NEUROD1* | *NEUROG3* | *NF1* | *NFE2L2* | *NFIA* |
| *NFIX* | *NFKB2* | *NFKBIA* | *NFU1* | *NGLY1* | *NHS* | *NIN* | *NIPAL4* | *NIPBL* | *NKX2-1* |
| *NKX2-5* | *NKX2-6* | *NLRP3* | *NLRP7* | *NME1* | *NNT* | *NOBOX* | *NOD2* | *NOLA2* | *NOLA3* |
| *NONO* | *NOS1AP* | *NOS2A* | *NOS3* | *NOTCH2* | *NOTCH3* | *NPC1* | *NPC2* | *NPHP1* | *NPHP3* |
| *NPHP4* | *NPHS1* | *NPHS2* | *NPR2* | *NR0B1* | *NR0B2* | *NR1H4* | *NR2E3* | *NR3C1* | *NR3C2* |
| *NR5A1* | *NRAS* | *NRIP1* | *NRL* | *NRXN1* | *NSD1* | *NSDHL* | *NSMCE2* | *NSMF* | *NT5C3A* |
| *NTHL1* | *NTN1* | *NTRK1* | *NTRK2* | *NUBPL* | *NUMA1* | *NUP107* | *NUP133* | *NUP160* | *NUP205* |
| *NUP214* | *NUP62* | *NUP85* | *NUP93* | *NUS1* | *NXN* | *OAT* | *OCLN* | *OCRL* | *ODC1* |
| *OFD1* | *OGG1* | *OPA1* | *OPA3* | *OPCML* | *OPHN1* | *OPLAH* | *ORAI1* | *ORC1* | *OSGEP* |
| *OSMR* | *OSTM1* | *OTC* | *OTX2* | *OXCT1* | *P3H1* | *P4HB* | *P4HTM* | *PABPN1* | *PACS1* |
| *PAH* | *PAK1* | *PALB2* | *PALLD* | *PANK2* | *PAPSS2* | *PARK2* | *PARN* | *PARS2* | *PAX1* |
| *PAX2* | *PAX4* | *PAX6* | *PAX8* | *PBX1* | *PC* | *PCARE* | *PCBD1* | *PCCA* | *PCCB* |
| *PCK1* | *PCNT* | *PCSK1* | *PCSK9* | *PDCD1* | *PDCN* | *PDE11A* | *PDE4D* | *PDE6A* | *PDE6B* |
| *PDE6D* | *PDE6G* | *PDE8B* | *PDGFRB* | *PDGFRL* | *PDHA1* | *PDHB* | *PDHX* | *PDLIM4* | *PDP1* |
| *PDSS1* | *PDSS2* | *PDX1* | *PEPD* | *PET100* | *PEX1* | *PEX10* | *PEX11B* | *PEX12* | *PEX13* |
| *PEX14* | *PEX16* | *PEX19* | *PEX2* | *PEX26* | *PEX3* | *PEX5* | *PEX6* | *PEX7* | *PFC* |
| *PFKM* | *PGAM2* | *PGAP2* | *PGAP3* | *PGK1* | *PGM1* | *PGM3* | *PHC1* | *PHEX* | *PHF21A* |
| *PHF6* | *PHF9* | *PHGDH* | *PHIP* | *PHKA1* | *PHKA2* | *PHKB* | *PHKG2* | *PHYH* | *PI4KA* |
| *PIBF1* | *PIEZO1* | *PIEZO2* | *PIGA* | *PIGH* | *PIGL* | *PIGN* | *PIGO* | *PIGP* | *PIGQ* |
| *PIGT* | *PIGV* | *PIGW* | *PIGY* | *PIK3C2A* | *PIK3CA* | *PIK3R1* | *PIK3R2* | *PIK3R5* | *PINK1* |
| *PITX2* | *PKD1* | *PKD2* | *PKHD1* | *PKLR* | *PLA2G2A* | *PLA2G4A* | *PLA2G7* | *PLAA* | *PLAU* |
| *PLCD1* | *PLCE1* | *PLD1* | *PLEC* | *PLEC1* | *PLEKHM1* | *PLG* | *PLI* | *PLIN1* | *PLOD1* |
| *PLOD2* | *PLP1* | *PLS3* | *PLVAP* | *PMM2* | *PMPCA* | *PMPCB* | *PNKD* | *PNKP* | *PNLIP* |
| *PNP* | *PNPLA2* | *PNPLA6* | *PNPLA8* | *PNPO* | *PNPT1* | *POC1A* | *POF1B* | *POGZ* | *POLA1* |
| *POLD1* | *POLE* | *POLG* | *POLG2* | *POLR1C* | *POLR3A* | *POLR3B* | *POLRMT* | *POMC* | *POMGNT1* |
| *POMT1* | *PON1* | *POR* | *PORCN* | *POU1F1* | *POU6F2* | *PP1R17* | *PPA2* | *PPARG* | *PPIB* |
| *PPM1K* | *PPOX* | *PPP1R12A* | *PPP1R15B* | *PPP1R17* | *PPP1R3A* | *PPP2R3C* | *PPP2R5D* | *PPP3CA* | *PPT1* |
| *PQBP1* | *PRCC* | *PRCD* | *PRDX1* | *PREPL* | *PRF1* | *PRG4* | *PRKACA* | *PRKAG2* | *PRKAR1A* |
| *PRKCD* | *PRKCSH* | *PRKN* | *PRLR* | *PRMT7* | *PROC* | *PRODH* | *PROK2* | *PROKR2* | *PROM1* |
| *PROP1* | *PRPF3* | *PRPF31* | *PRPF4* | *PRPF6* | *PRPF8* | *PRPH* | *PRPH2;ROM1* | *PRPS1* | *PRSS1* |
| *PRSS2* | *PSAP* | *PSAT1* | *PSMB4* | *PSMB8* | *PSMB9* | *PSMC3IP* | *PSMD12* | *PSPH* | *PSTPIP1* |
| *PTCH1* | *PTDSS1* | *PTEN* | *PTF1A* | *PTGIS* | *PTH* | *PTH1R* | *PTHB1* | *PTPN1* | *PTPN11* |
| *PTPN12* | *PTPN22* | *PTPRJ* | *PTPRO* | *PTRH2* | *PTS* | *PUF60* | *PURA* | *PUS1* | *PYCR1* |
| *PYCR2* | *PYGL* | *PYGM* | *PYROXD1* | *QARS1* | *QDPR* | *QRSL1* | *RAB18* | *RAB23* | *RAB27A* |
| *RAB33B* | *RAB3GAP1* | *RAB3GAP2* | *RAD21* | *RAD51* | *RAD51C* | *RAD54B* | *RAF1* | *RAG1* | *RAG2* |
| *RAI1* | *RANBP2* | *RARB* | *RARS2* | *RASA1* | *RASGRP1* | *RB1* | *RBBP8* | *RBCK1* | *RBM10* |
| *RBM28* | *RBM8A* | *RBMX* | *RBP3* | *RCBTB1* | *RDH12* | *RDX* | *RECQL2* | *RECQL4* | *REEP1* |
| *REEP6* | *REN* | *RERE* | *REST* | *RET* | *RETN* | *RFC2* | *RFT1* | *RFWD3* | *RFX6* |
| *RGR* | *RHAG* | *RHO* | *RIN2* | *RINT1* | *RIPK4* | *RIT1* | *RMND1* | *RMRP* | *RNASEH1* |
| *RNASEH2A* | *RNASEH2B* | *RNASEH2C* | *RNF113A* | *RNF125* | *RNF139* | *RNF216* | *RNPC3* | *RNU4ATAC* | *ROBO2* |
| *ROBO3* | *ROR2* | *RP1* | *RP1L1* | *RP2* | *RP9* | *RPE65* | *RPGR* | *RPGRIP1L* | *RPIA* |
| *RPL10* | *RPL11* | *RPL15* | *RPL18* | *RPL26* | *RPL27* | *RPL35* | *RPL35A* | *RPL5* | *RPS10* |
| *RPS15A* | *RPS17* | *RPS19* | *RPS24* | *RPS26* | *RPS27* | *RPS28* | *RPS29* | *RPS7* | *RRAS2* |
| *RRM2B* | *RSPO1* | *RSPO2* | *RSPRY1* | *RTEL1* | *RTN4IP1* | *RTN4R* | *RTTN* | *RUNX2* | *RXYLT1* |
| *RYR1* | *SACS* | *SAG* | *SALL1* | *SALL4* | *SAMD9* | *SAMHD1* | *SAR1B* | *SARDH* | *SARS2* |
| *SASH1* | *SASS6* | *SBDS* | *SC5D* | *SC5DL* | *SCAPER* | *SCARB2* | *SCN10A* | *SCN11A* | *SCN1A* |
| *SCN1B* | *SCN2A* | *SCN4A* | *SCN4B* | *SCN5A* | *SCN9A* | *SCNN1A* | *SCNN1B* | *SCNN1G* | *SCO1* |
| *SCO2* | *SCP2* | *SCYL1* | *SDC3* | *SDCCAG8* | *SDHA* | *SDHAF1* | *SDHAF2* | *SDHB* | *SDHC* |
| *SDHD* | *SEC23B* | *SEC24D* | *SEC61A1* | *SEC63* | *SECISBP2* | *SELENON* | *SEMA3A* | *SEMA3E* | *SEMA4A* |
| *SEPT12* | *SERAC1* | *SERPINA1* | *SERPINA6* | *SERPINA7* | *SERPINF1* | *SERPINH1* | *SETBP1* | *SETD1A* | *SETD2* |
| *SETX* | *SF3B4* | *SFRP4* | *SFTPC* | *SFXN4* | *SGMS2* | *SGPL1* | *SGSH* | *SH2D1A* | *SH3KBP1* |
| *SHANK3* | *SHH* | *SHOC2* | *SHOX* | *SHPK* | *SI* | *SIAE* | *SIGMAR1* | *SIK1* | *SIL1* |
| *SIN3A* | *SIX1* | *SIX3* | *SIX5* | *SKIV2L* | *SLC10A2* | *SLC10A7* | *SLC11A2* | *SLC12A1* | *SLC12A3* |
| *SLC16A1* | *SLC16A12* | *SLC16A2* | *SLC17A3* | *SLC17A5* | *SLC19A2* | *SLC19A3* | *SLC1A1* | *SLC22A12* | *SLC22A5* |
| *SLC25A1* | *SLC25A11* | *SLC25A12* | *SLC25A13* | *SLC25A15* | *SLC25A19* | *SLC25A20* | *SLC25A21* | *SLC25A22* | *SLC25A24* |
| *SLC25A26* | *SLC25A3* | *SLC25A32* | *SLC25A38* | *SLC25A4* | *SLC25A42* | *SLC25A46* | *SLC26A1* | *SLC26A2* | *SLC26A3* |
| *SLC26A4* | *SLC26A8* | *SLC29A3* | *SLC2A1* | *SLC2A10* | *SLC2A2* | *SLC2A9* | *SLC30A10* | *SLC30A2* | *SLC30A8* |
| *SLC30A9* | *SLC33A1* | *SLC34A1* | *SLC34A3* | *SLC35A1* | *SLC35A2* | *SLC35C1* | *SLC36A2* | *SLC37A4* | *SLC39A13* |
| *SLC39A14* | *SLC39A4* | *SLC39A8* | *SLC3A1* | *SLC40A1* | *SLC44A1* | *SLC4A1* | *SLC4A4* | *SLC52A1* | *SLC52A2* |
| *SLC52A3* | *SLC5A1* | *SLC5A2* | *SLC5A5* | *SLC6A17* | *SLC6A19* | *SLC6A20* | *SLC6A9* | *SLC7A14* | *SLC7A7* |
| *SLC7A9* | *SLC9A3R1* | *SLCO1B1* | *SLCO1B3* | *SLCO2A1* | *SLITRK6* | *SLX4* | *SMAD4* | *SMARCA2* | *SMARCA4* |
| *SMARCAL1* | *SMARCB1* | *SMARCC2* | *SMARCE1* | *SMC1A* | *SMC3* | *SMCHD1* | *SMOC1* | *SMPD1* | *SMS* |
| *SNAI2* | *SNAP29* | *SNRNP200* | *SNRPB* | *SNRPN* | *SNTA1* | *SNX10* | *SOD1* | *SOD2* | *SOHLH1* |
| *SON* | *SOS1* | *SOS2* | *SOST* | *SOX10* | *SOX11* | *SOX17* | *SOX18* | *SOX2* | *SOX3* |
| *SOX9* | *SP110* | *SP7* | *SPARC* | *SPATA16* | *SPATA5* | *SPATA7* | *SPECC1L* | *SPEF2* | *SPG11* |
| *SPG7* | *SPINK1* | *SPINK5* | *SPINT2* | *SPR* | *SPRTN* | *SPRY2* | *SPRY4* | *SPTA1* | *SPTB* |
| *SQSTM1* | *SRC* | *SRCAP* | *SRD5A2* | *SRD5A3* | *SRGAP1* | *SRY* | *SSR4* | *ST3GAL5* | *STAG3* |
| *STAMBP* | *STAR* | *STAT1* | *STAT2* | *STAT3* | *STAT4* | *STAT5B* | *STEAP3* | *STIL* | *STIM1* |
| *STK11* | *STN1* | *STOX1* | *STRA6* | *STRADA* | *STS* | *STT3A* | *STT3B* | *STUB1* | *STX11* |
| *STX16* | *STX1A* | *STXBP1* | *STXBP2* | *SUCLA2* | *SUCLG1* | *SUFU* | *SUGCT* | *SULT2B1* | *SUMF1* |
| *SUMO4* | *SUOX* | *SURF1* | *SYCE1* | *SYCP2* | *SYCP3* | *SYN2* | *SYNE1* | *SYNE2* | *SYNJ1* |
| *TAC3* | *TACO1* | *TACR3* | *TAF13* | *TAF4B* | *TALDO1* | *TANGO2* | *TAOK1* | *TAPT1* | *TARS1* |
| *TARS2* | *TAT* | *TAZ* | *TBC1D20* | *TBC1D24* | *TBC1D4* | *TBC1D7* | *TBCE* | *TBCK* | *TBL1X* |
| *TBL2* | *TBP* | *TBX1* | *TBX15* | *TBX18* | *TBX19* | *TBX2* | *TBX22* | *TBX3* | *TBX5* |
| *TBX6* | *TBXAS1* | *TCF20* | *TCF7L2* | *TCIRG1* | *TCN2* | *TCTEX1D2* | *TCTN2* | *TCTN3* | *TDO2* |
| *TDP1* | *TDP2* | *TDRD9* | *TECT1* | *TENT5A* | *TERC* | *TERT* | *TEX11* | *TEX14* | *TEX15* |
| *TF* | *TFAM* | *TFAP2A* | *TFE3* | *TFG* | *TFR2* | *TG* | *TGFB1* | *TGIF1* | *TGM1* |
| *THBD* | *THG1L* | *THOC2* | *THOC6* | *THRA* | *THRB* | *TIMM22* | *TIMM50* | *TIMM8A* | *TIMMDC1* |
| *TINF2* | *TIRAP* | *TJP2* | *TK2* | *TKFC* | *TKT* | *TLR2* | *TMCO1* | *TMEM107* | *TMEM126A* |
| *TMEM126B* | *TMEM127* | *TMEM138* | *TMEM165* | *TMEM199* | *TMEM216* | *TMEM231* | *TMEM237* | *TMEM260* | *TMEM270* |
| *TMEM38B* | *TMEM43* | *TMEM67* | *TMEM70* | *TMPRSS6* | *TMX2* | *TNF* | *TNFRSF11A* | *TNFRSF11B* | *TNFSF11* |
| *TNNI3* | *TNNT1* | *TNPO3* | *TNXB* | *TOE1* | *TONSL* | *TOP3A* | *TOPORS* | *TP53* | *TP53RK* |
| *TP63* | *TPI1* | *TPK1* | *TPM2* | *TPM3* | *TPO* | *TPP1* | *TPRKB* | *TRAF3IP1* | *TRAF3IP2* |
| *TRAF7* | *TRAIP* | *TRAK1* | *TRAPPC11* | *TRAPPC2* | *TRAPPC9* | *TRDN* | *TREX1* | *TRHR* | *TRIM32* |
| *TRIM36* | *TRIM37* | *TRIO* | *TRIP11* | *TRIP12* | *TRIP13* | *TRIP4* | *TRIT1* | *TRMT10A* | *TRMT10C* |
| *TRMT5* | *TRMU* | *TRNT1* | *TRPC6* | *TRPM6* | *TRPS1* | *TRPV6* | *TSC1* | *TSC2* | *TSFM* |
| *TSGA10* | *TSHB* | *TSHR* | *TSPYL1* | *TSR2* | *TTC19* | *TTC21B* | *TTC37* | *TTC8* | *TTI2* |
| *TTN* | *TTPA* | *TTR* | *TUB* | *TUBB3* | *TUFM* | *TULP1* | *TWIST1* | *TWIST2* | *TWNK* |
| *TXN2* | *TXNL4A* | *TXNRD2* | *TYMP* | *UBE2A* | *UBE2T* | *UBE3A* | *UBE3B* | *UBR1* | *UCP2* |
| *UCP3* | *UFSP2* | *UGT1A1* | *UMOD* | *UMPS* | *UNC13D* | *UNC45A* | *UNG* | *UPB1* | *UQCC2* |
| *UQCC3* | *UQCRB* | *UQCRC2* | *UQCRFS1* | *UQCRQ* | *UROC1* | *UROD* | *UROS* | *USH2A* | *USP18* |
| *USP8* | *USP9X* | *USP9Y* | *VANGL1* | *VARS2* | *VCL* | *VDR* | *VEGFA* | *VHL* | *VIPAS39* |
| *VPS13B* | *VPS13C* | *VPS13D* | *VPS33A* | *VPS33B* | *VPS37D* | *VPS45* | *VSX1* | *WAC* | *WARS2* |
| *WAS* | *WASF1* | *WASHC5* | *WDPCP* | *WDR11* | *WDR19* | *WDR34* | *WDR35* | *WDR37* | *WDR4* |
| *WDR60* | *WDR62* | *WDR66* | *WDR73* | *WFS1* | *WIPF1* | *WNK1* | *WNK4* | *WNT1* | *WNT3* |
| *WNT4* | *WNT5A* | *WNT7A* | *WRAP53* | *WRN* | *WT1* | *XDH* | *XIAP* | *XPA* | *XPC* |
| *XPNPEP3* | *XRCC2* | *XRCC4* | *XRCC9* | *XYLT1* | *XYLT2* | *YAP1* | *YARS2* | *YME1L1* | *YY1* |
| *YY1AP1* | *ZAP70* | *ZBTB16* | *ZBTB20* | *ZC4H2* | *ZEB2* | *ZFAT* | *ZFPM2* | *ZIC2* | *ZIC3* |
| *ZMPSTE24* | *ZMYND15* | *ZNF148* | *ZNF365* | *ZNF408* | *ZNF423* | *ZNF513* | *ZNF687* | *ZNF711* | *ZNRF3* |
